# Supplementary material for: Laser-induced microstructuring of two-dimensional layered inorganic–organic perovskites
Source: Royal Society of Chemistry journal article supplement (doi:10.1039/c6cp00357e), 2016-01-01
Supplement: c6cp00357e1.pdf [file c6cp00357e1.pdf]

## **Supporting Information**

# **Laser-induced microstructuring of two-dimensional layered inorganic-organic perovskites**

Pawan K. Kanaujia, and G. Vijaya Prakash\*

Nanophotonics Lab, Department of Physics, Indian Institute of Technology Delhi, Hauz Khas,  
New Delhi 110016, India.

\*Corresponding author  
Email: [prakash@physics.iitd.ac.in](mailto:prakash@physics.iitd.ac.in)

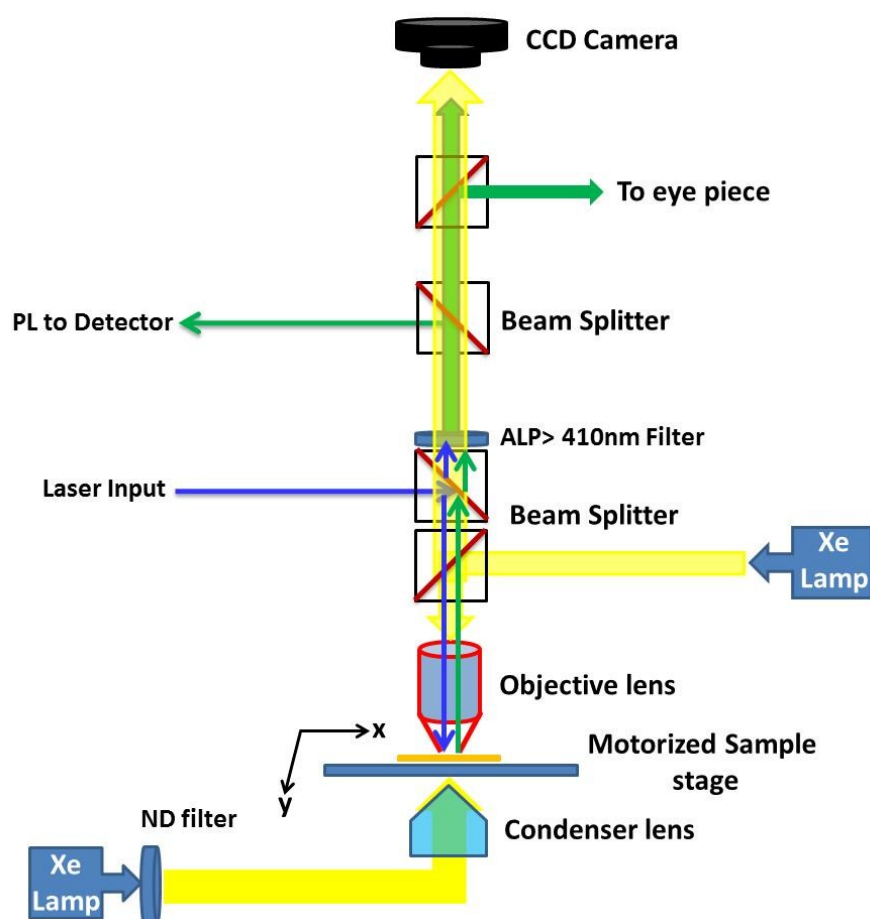

**Figure S1.** Schematic representation of modified microscope for PL spectra, high-resolution optical images (Bright field and PL images), spatial intensity mapping and spectral line scans. The optical components are, white light source (Xenon lamp), 405nm CW laser (< 20 mW), motorised XY- sample stage, fiber-optic spectrometer and a high-resolution camera. Both PL spectra and PL images were taken using a long-pass filter.

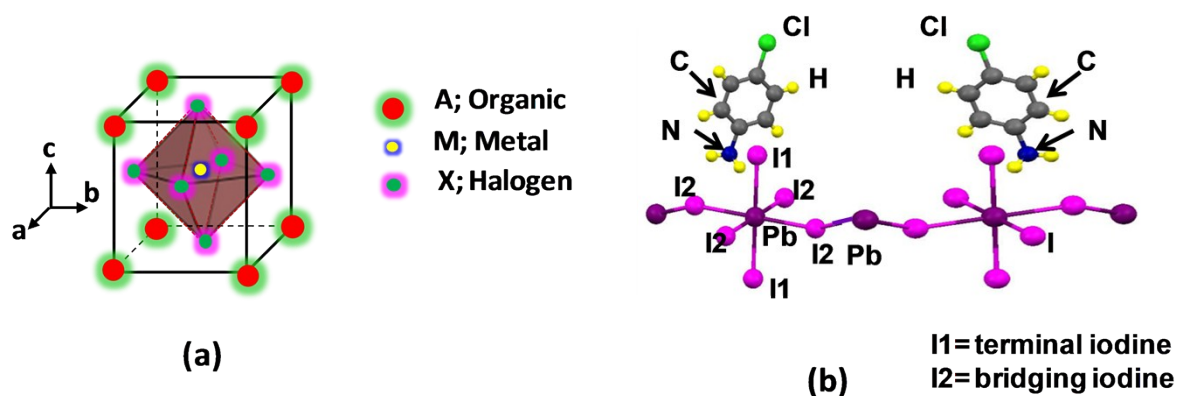

**Figure S2.** (a) Corner shared  $\text{MX}_6$  octahedra (where M is the metal such as  $\text{Pb}^{+2}$ ,  $\text{Sn}^{+2}$  etc., X is a halide such as  $\text{Cl}^-$ ,  $\text{Br}^-$  etc.) (b) Schematic crystal packing representation of  $(\text{R-NH}_3)_2\text{PbI}_4$  where organics are tagged to inorganic by hydrogen bonding. Figure (b) represents crystal packing of 2D CHPI perovskite, where  $\text{PbI}_6$  octahedra is connected with organic moiety with weak Vander wall interactions and bridging and terminal Iodines are indicated.

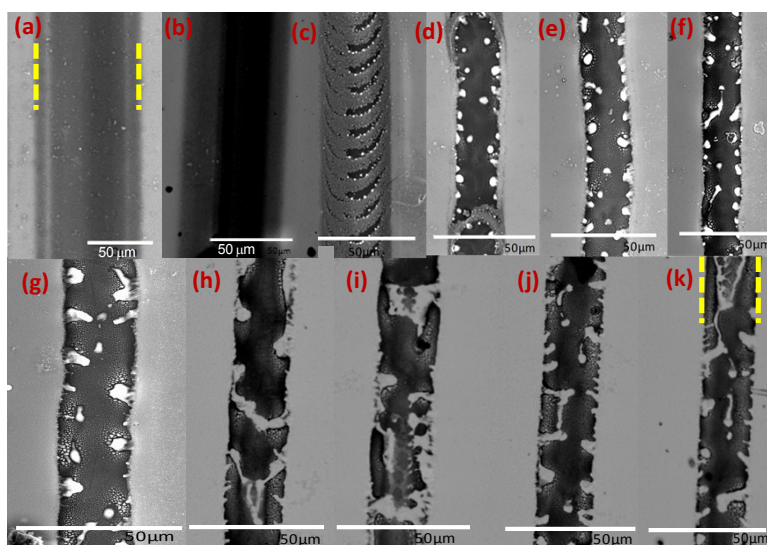

**Figure S3.** SEM images of laser written tracks on  $\text{PbI}_2$  thin film ( $\sim 135$  nm) with different scanning steps (a) 0.0001 mm, (b) 0.001 mm, (c) 0.01 mm, (d) 0.1 mm, (e) 0.2 mm, (f) 0.3 mm, (g) 0.4 mm, (h) 1 mm, (i) 2 mm, (j) 4 mm, (k) 8 mm. (II) Estimated channel writing width vs step size. Laser wavelength,  $\lambda = 410$  nm; at fixed laser power density  $= 2.54 \times 10^4$  W/cm<sup>2</sup>, laser focus spot size  $\phi = 18$   $\mu\text{m}$ . The resultant laser written track width is indicated by dotted yellow lines in shown in (a) and (k). A plot of estimated channel writing width vs step size at laser power density  $= 2.54 \times 10^4$  W/cm<sup>2</sup> is given in Fig. 2 (main text)

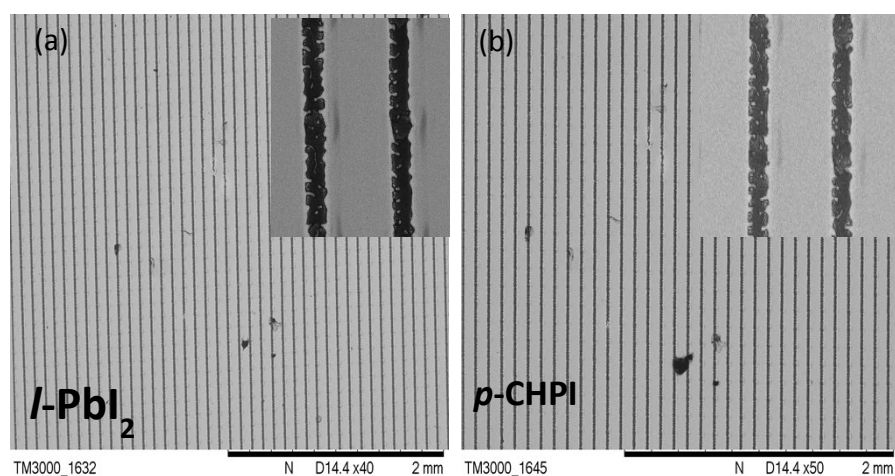

**Figure S4.** SEM images of Laser writing on (a)  $I\text{-PbI}_2$  and (b)  $I\text{-CHPI}$  thin films. Laser writing parameters are  $2.54 \times 10^4 \text{ W/cm}^2$  and scan step size 0.01 mm.

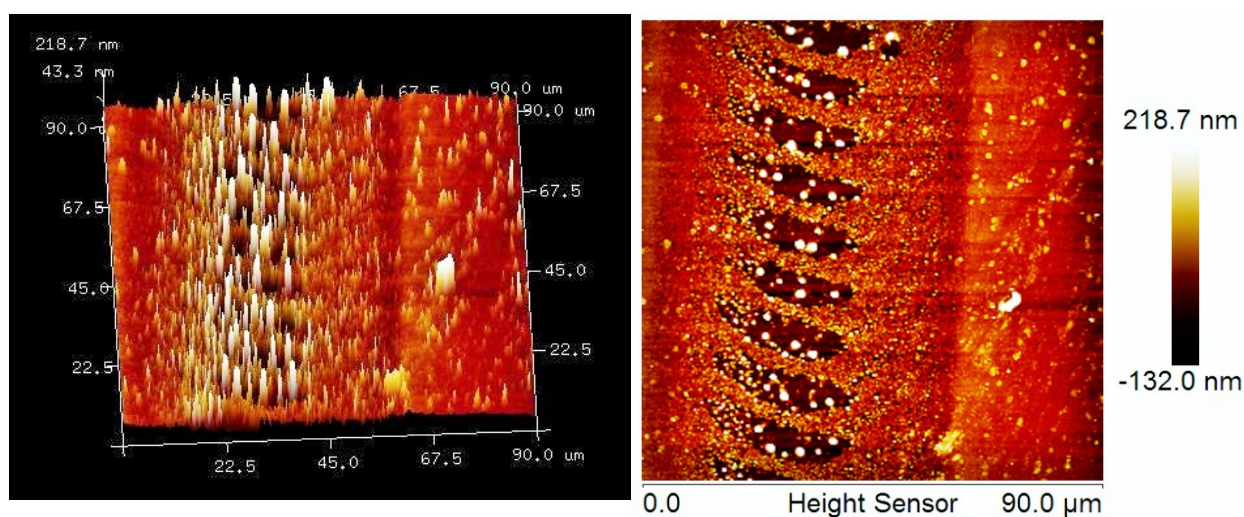

**Figure S5.** AFM image and three-dimensional view of  $I\text{-PbI}_2$  showing material agglomeration as nano-pillars at the boundaries. The average roughness in the laser written area is about 28 nm compared to the roughness of unwritten area, 11 nm.

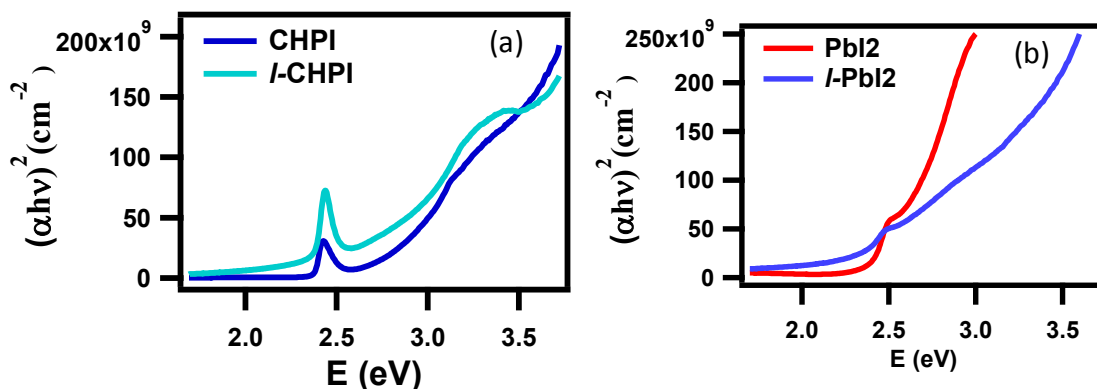

**Figure S6.** Absorption spectral analysis (Tauc plots) of (a) laser written CHPI (*I*-CHPI) films and (b) Pbl<sub>2</sub> (*I*-Pbl<sub>2</sub>) films along with respective bare films. Clearly before and after the laser irradiation, Pbl<sub>2</sub> and CHPI shows a modification in the optical bandgap. However, the band edge shift is more significant in Pbl<sub>2</sub> than in CHPI. Furthermore, the exciton absorption, similar to PL, shows a clear blue shift.

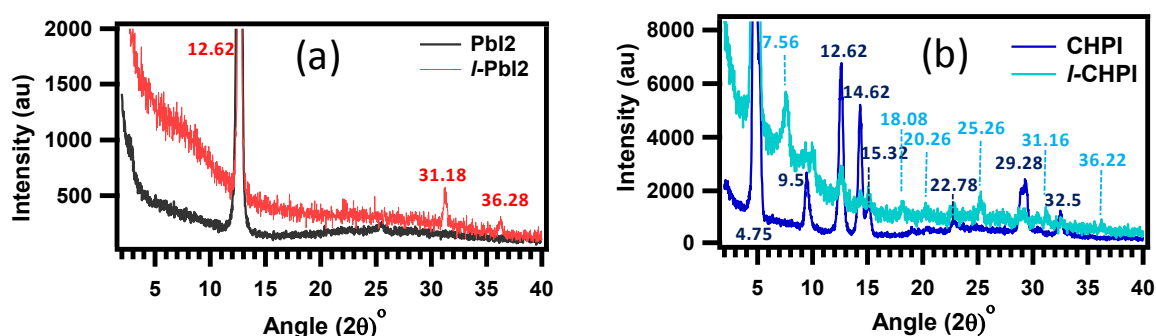

**Figure S7.** X-Ray diffraction analysis of (a) Pbl<sub>2</sub> and *I*-Pbl<sub>2</sub> (b) CHPI and *I*-CHPI. Figure (b) shows that during the laser irradiation, Pbl<sub>2</sub> retain almost the layered arrangement (strong (100) diffracted plane at 12.62°), along with other diffraction peaks indicating the distortion in crystal packing. In figure (b) CHPI X-Ray diffraction shows typical (00*l*) modes, indicating the layered arrangements. Whereas, after laser irradiation, diffractions from other planes are also clearly visible, indicating the crystal packing modification/distortion.

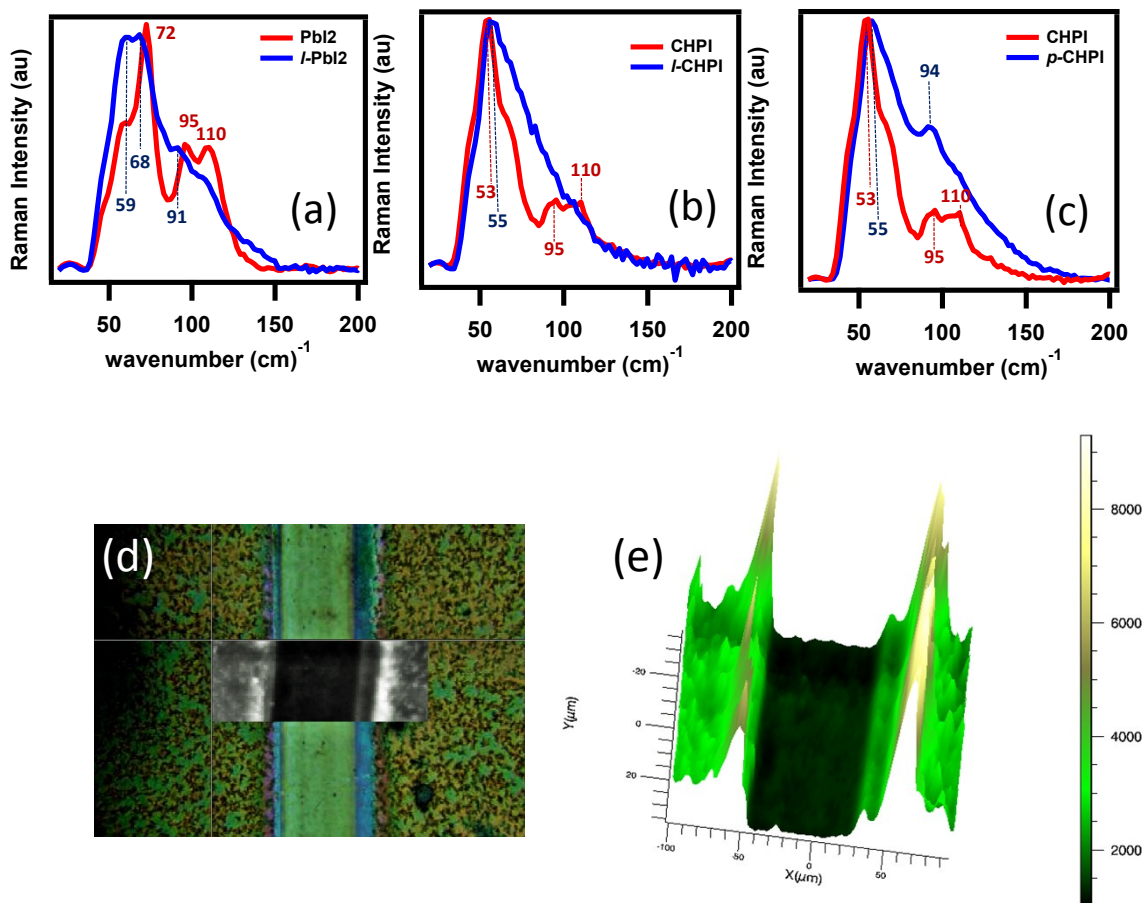

**Figure S8.** Raman spectra of (a) *l*-PbI<sub>2</sub> and PbI<sub>2</sub> (b) *l*-CHPI and CHPI (c) *p*-CHPI and CHPI films and (d) Raman area mapping 2D image (e) 3D Mapping Image of laser written grooves of CHPI at 53 cm<sup>-1</sup>. The laser excitation is at 632.7 nm having notch filter close to 50 cm<sup>-1</sup>.

Warren and Liang reported that when pristine PbI<sub>2</sub> crystals at resonant excitation (517 nm) are intercalated with alkylamines, the characteristic and prominent peaks at ~73 and 96 cm<sup>-1</sup> attributed to Pb-I stretching vibrational modes (1T polytype E<sub>g</sub> and A<sub>1g</sub>) completely vanished [J. Phys: Condens. Mater., 5(1993) 6407]. Baibarac et al. and Preda et al. reported strong Raman peaks of PbI<sub>2</sub> single crystals between 70-150 cm<sup>-1</sup>, attributed to polytype 2H and 4H-PbI<sub>2</sub> vibrational modes [J. Solidstate Chem., 182(2009) 87 and J. Phys: Condens. Mater., 18 (2006) 8899]. In our present experiments, while bare PbI<sub>2</sub> films show standard Raman spectral features, the laser written PbI<sub>2</sub> (*l*-PbI<sub>2</sub>) showed considerable change in the spectral features: exclusively the E<sub>g</sub> mode merged with a band at 59 cm<sup>-1</sup> which could possibly be attributed to transverse optical (TO) phonon modes. On comparison of PbI<sub>2</sub> and

CHPI, the Raman spectra are notably different and indicating the structural changes in *Pb-I* crystal packing. While  $96\text{ cm}^{-1}$  ( $E_{2g}$ ) modes are common, in CHPI the  $73\text{ cm}^{-1}$  is merged with the mode at  $53\text{ cm}^{-1}$ . Both *I*-CHPI and *p*-CHPI shows considerable distortion in the Pbl network, which is visible in Raman spectra. However the data is inconclusive, a high-resolution spectral data with both resonant and non-resonant excitation would give much clear information.
